# Supplementary material
Source: HighWire-hosted journal article supplement (https://bmjopenquality.bmj.com/content/11/2/e001483)
Supplement: inline-supplementary-material-2 [file inline-supplementary-material-2.pdf]

## \*Obstetric Triage Tool

| Obstetric Triage Tool                                       | RED                                                                                                                        | AMBER                                                                                              | GREEN                                                                                                                               | WHITE                                                                                                                |
|-------------------------------------------------------------|----------------------------------------------------------------------------------------------------------------------------|----------------------------------------------------------------------------------------------------|-------------------------------------------------------------------------------------------------------------------------------------|----------------------------------------------------------------------------------------------------------------------|
|                                                             | Level 1:<br>(Resuscitative)                                                                                                | Level 2:<br>(Emergent)                                                                             | Level 3:<br>(Urgent)                                                                                                                | Level 4:<br>(Non-Urgent)                                                                                             |
| Assessment by Nurse/Senior Resident/ Instructor /Consultant | As soon as possible and within 15 min                                                                                      | <30 min                                                                                            | -                                                                                                                                   | -                                                                                                                    |
| Assessment by Nurse/Resident/SMO                            | -                                                                                                                          | -                                                                                                  | <60 min                                                                                                                             | < 120min                                                                                                             |
| Reassessment/Obs                                            | Every 5 min                                                                                                                | Every 15 min                                                                                       | Every 60 min                                                                                                                        | -                                                                                                                    |
| Place to be seen                                            | LROR/Labor Ward for urgent transfers from triage                                                                           | Triage assessment (LTR)                                                                            | Triage assessment (LTR)                                                                                                             | Triage Assessment (LTA/LTR)                                                                                          |
| Place to be Shifted                                         |                                                                                                                            | Admission to LR                                                                                    | Admission to LR /Ward                                                                                                               | Admitted to ward/Next appointment/Discharge                                                                          |
| Labor/fluid                                                 | Imminent birth                                                                                                             | Pre-term labor/PPROM<br>Active labor at term                                                       | Latent labor at term, term pre-labor SROM                                                                                           | Discomfort of pregnancy                                                                                              |
| Bleeding                                                    | Active vaginal bleeding, with or without abdominal pain                                                                    | Bleeding associated with cramping (> Spotting) < 37 weeks                                          | Bleeding associated with cramping/Spotting> 37 weeks                                                                                |                                                                                                                      |
| Sepsis                                                      |                                                                                                                            | Temp >38.3 (initiate sepsis 6)                                                                     | Temp 37.7-38.2                                                                                                                      | Temp 37.2-37.6                                                                                                       |
| Hypertension                                                | Seizure                                                                                                                    | BP >160/110 and headache or visual disturbance / RUQ pain                                          | Mild to moderate hypertension<br>BP> 140/90                                                                                         |                                                                                                                      |
| Fetal                                                       | Pathological CTG, or no fetal movement                                                                                     | Suspicious CTG                                                                                     | Reduced Fetal Movements                                                                                                             |                                                                                                                      |
| Other                                                       | Acute onset severe abdominal pain<br>Collapse/altered GCS<br>Cord prolapse<br>Severe SOB unable to speak in full sentences | Chest pain Palpitations<br>SOB Unwell with abnormal MEOWS score<br>Labor pains with Previous Scars | Abdominal/back pain<br>Flank pain Hematuria, itching, nausea /vomiting, diarrhea, fall without contractions or bleeding, calf pain. | 1.Scan review<br>2.Presentation scan<br>3.Blood test review<br>4. Cold/Flu symptoms,<br>5. Fetal Surveillance (CTG), |

\* Raniolo, C. (2016). (rep.). Improvement of Maternity Triage MAU at NUH. Retrieved 2021, from <https://fabnhsstuff.net/fab-stuff/maternity-triage-and-day-assessment>.
